# Supplementary material for: Xyloglucan Oligosaccharides Hydrolysis by Exo-Acting Glycoside Hydrolases from Hyperthermophilic Microorganism Saccharolobus solfataricus
Source: PubMed Central journal article supplement (PMC8037949; doi:10.3390/ijms22073325), 2021-03-24
Supplement: ijms-22-03325-s001.pdf [file ijms-22-03325-s001.pdf]

**Figure S1:** HPAEC-PAD chromatograms of the enzymatic treatment of XGO1 by using LacS 2.2 U and XylS 0.1 U

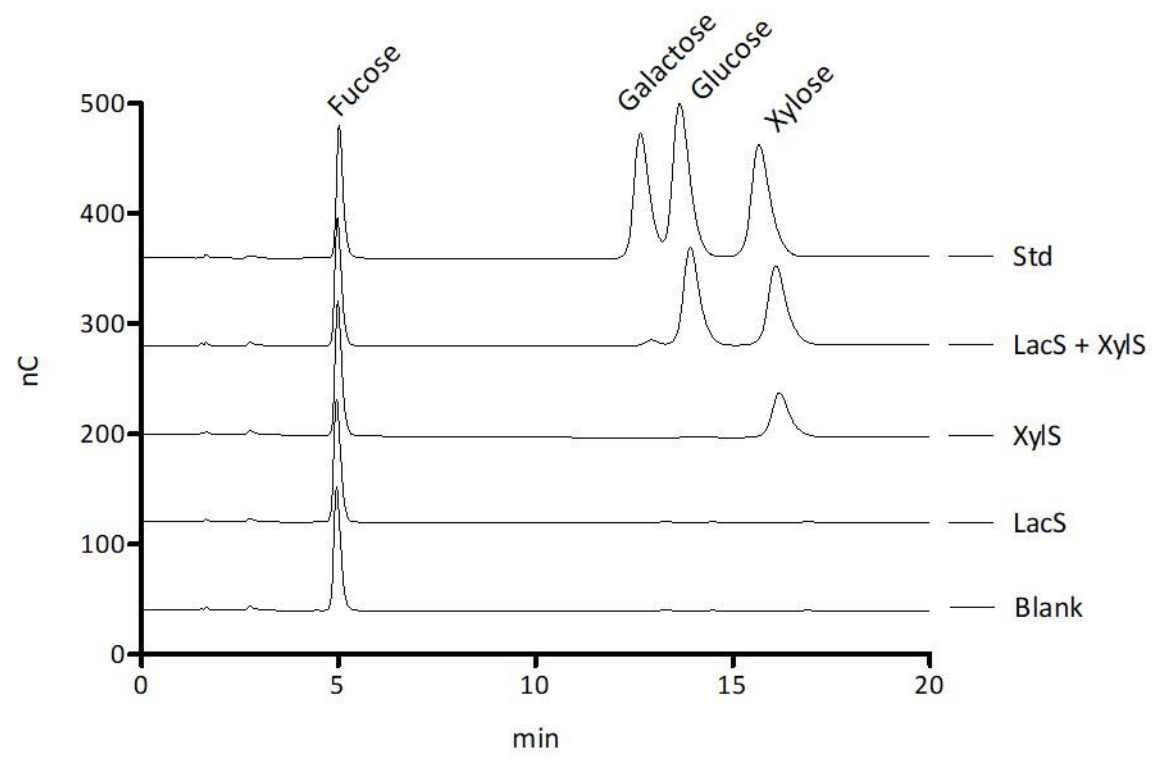

**Figure S2:** HPAEC-PAD chromatograms of the time course of the enzymatic treatment of XGO1 by using LacS 2.2 U and XylS 0.1 U

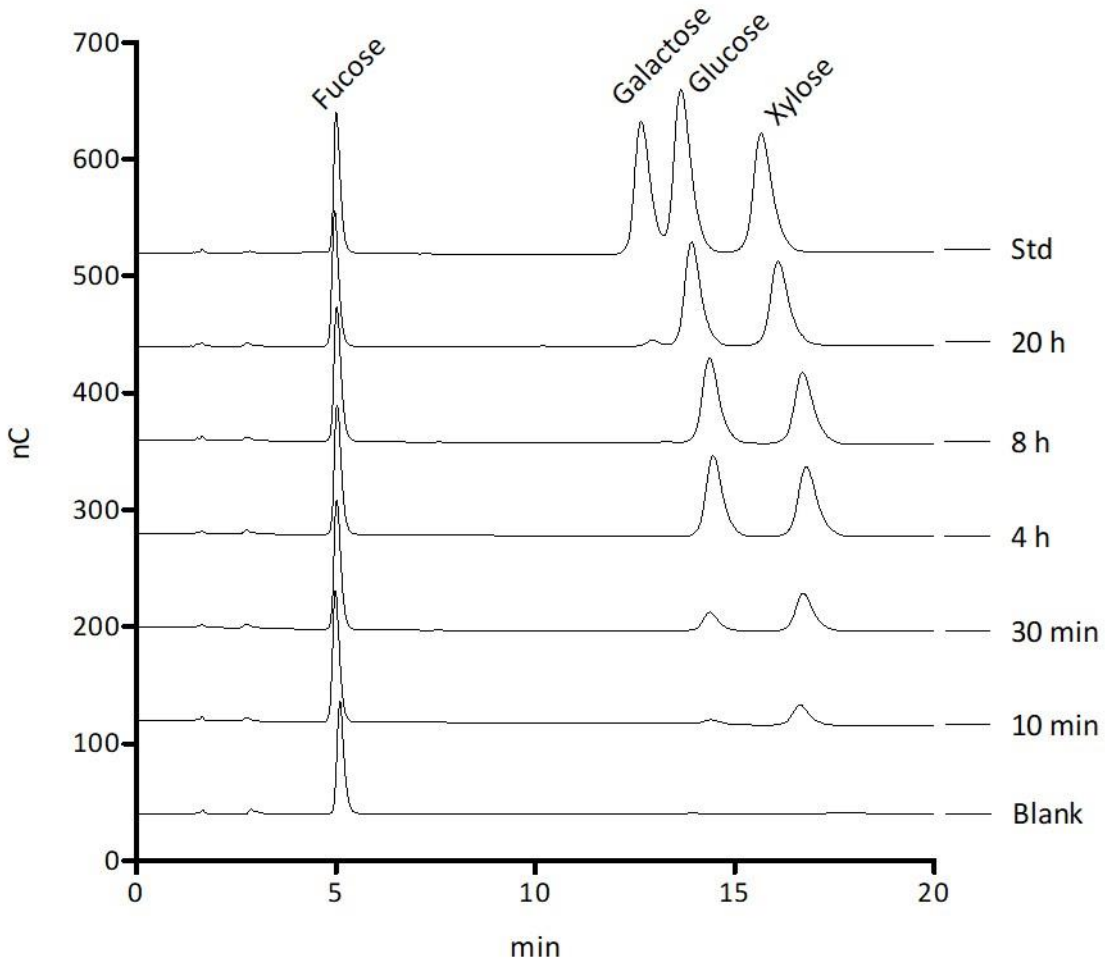

Figure S3: HPAEC-PAD chromatograms of the enzymatic treatment of XGO1 by using LacS 18 U and XylS 0.1 U

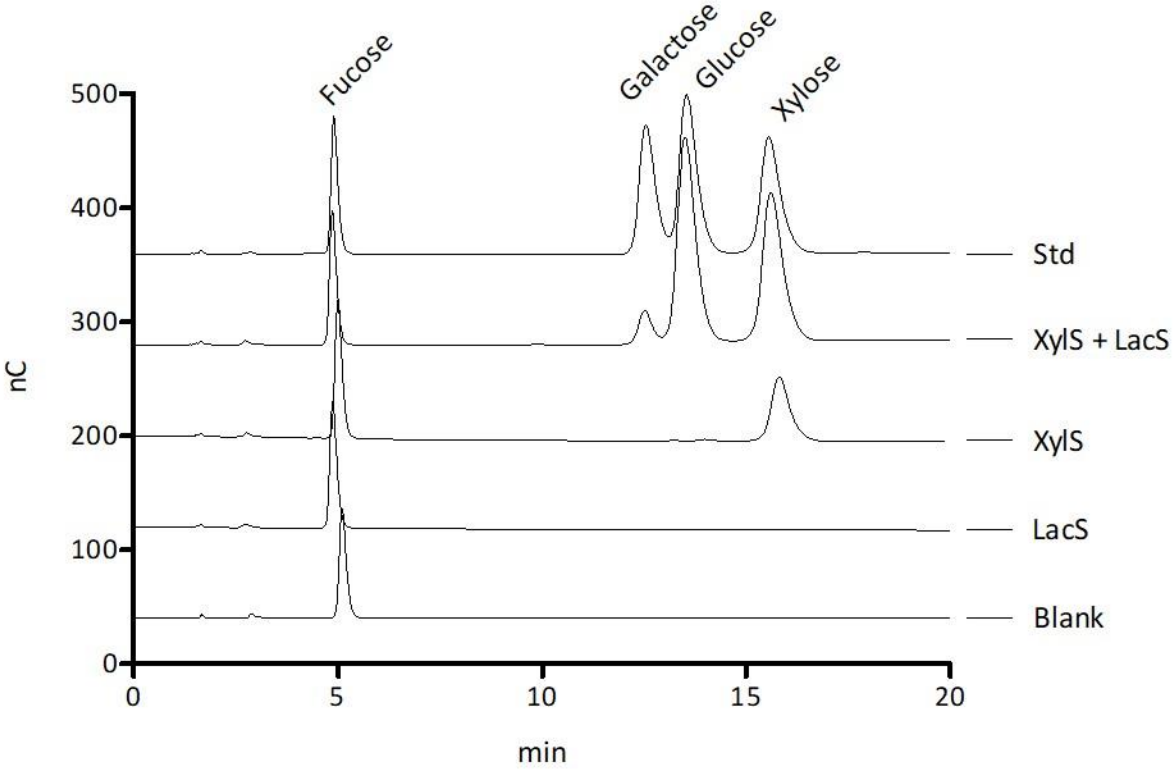

**Figure S4:** HPAEC-PAD chromatograms of the time course of the enzymatic treatment of XGO1 by using LacS 18 U and XylS 0.1 U

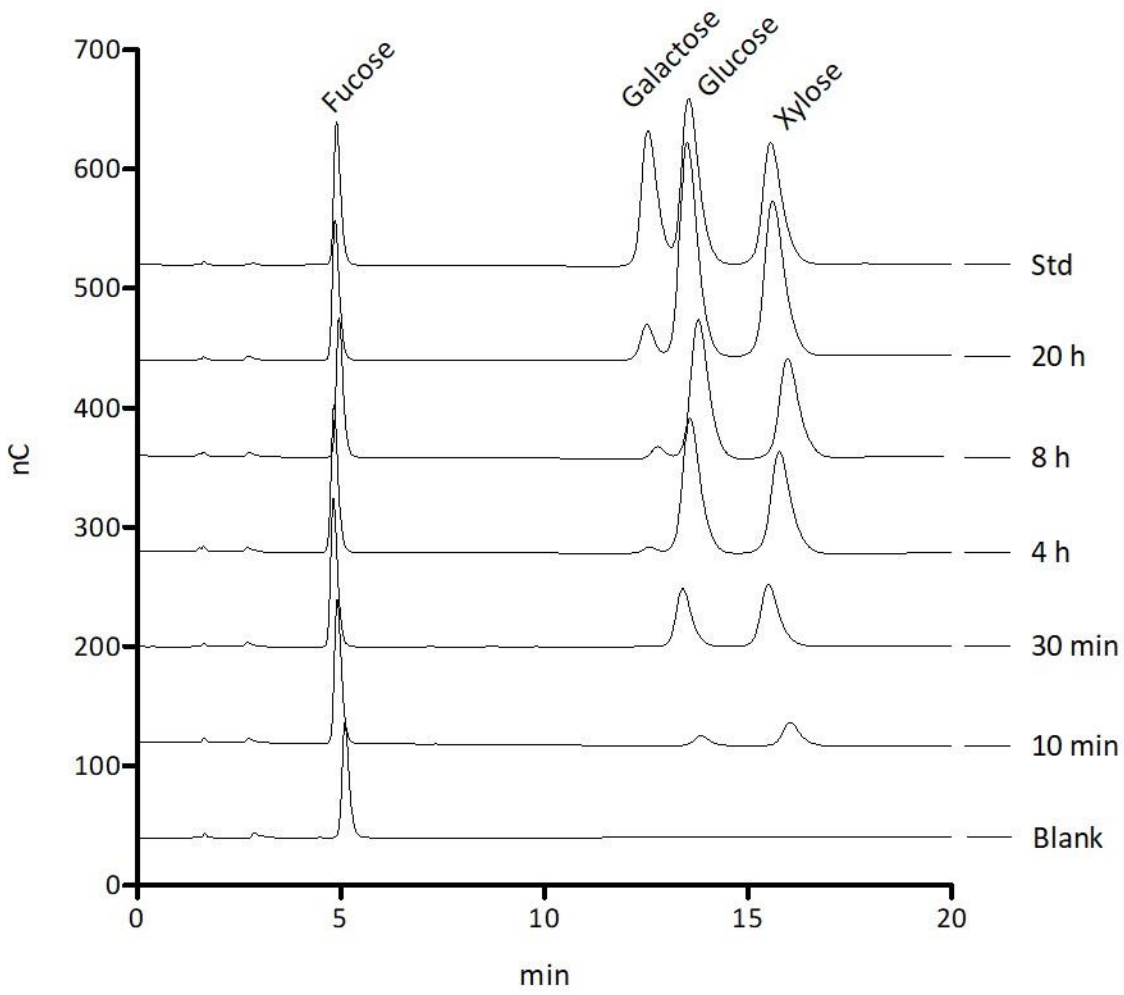

Figure S5: HPAEC-PAD chromatograms of the enzymatic treatment of XGO2 by LacS 2.2 U, XylS 0.1 U and Ss $\alpha$ Fuc 0.3 U

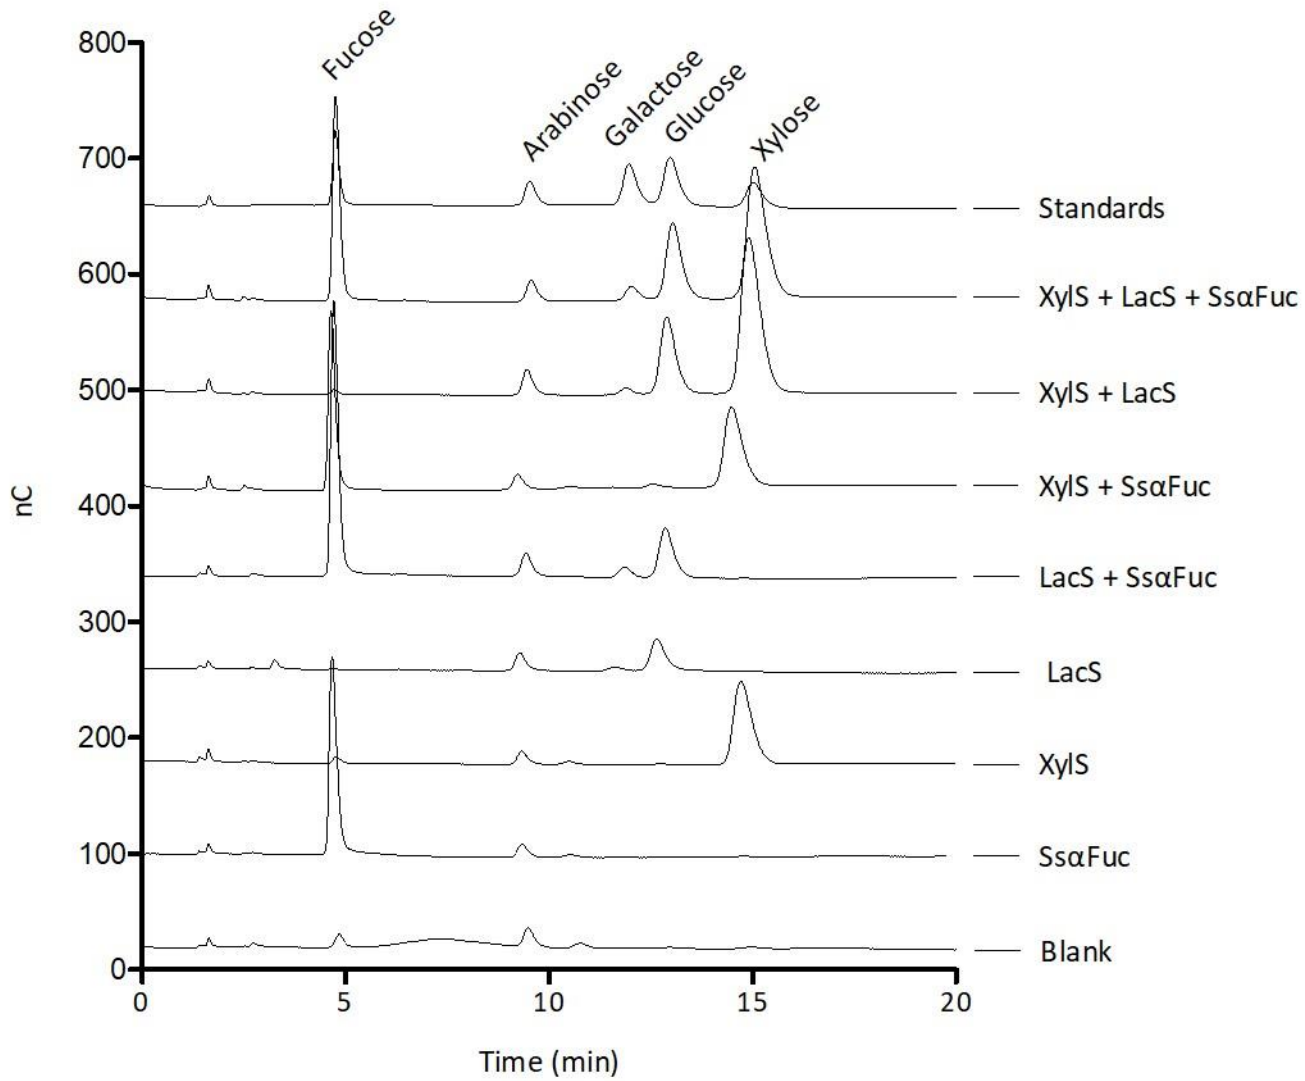

**Figure S6:** HPAEC-PAD chromatograms of the time course of the enzymatic treatment of XGO2 by LacS 2.2 U, XylS 0.1 U and SsaFuc 0.3 U

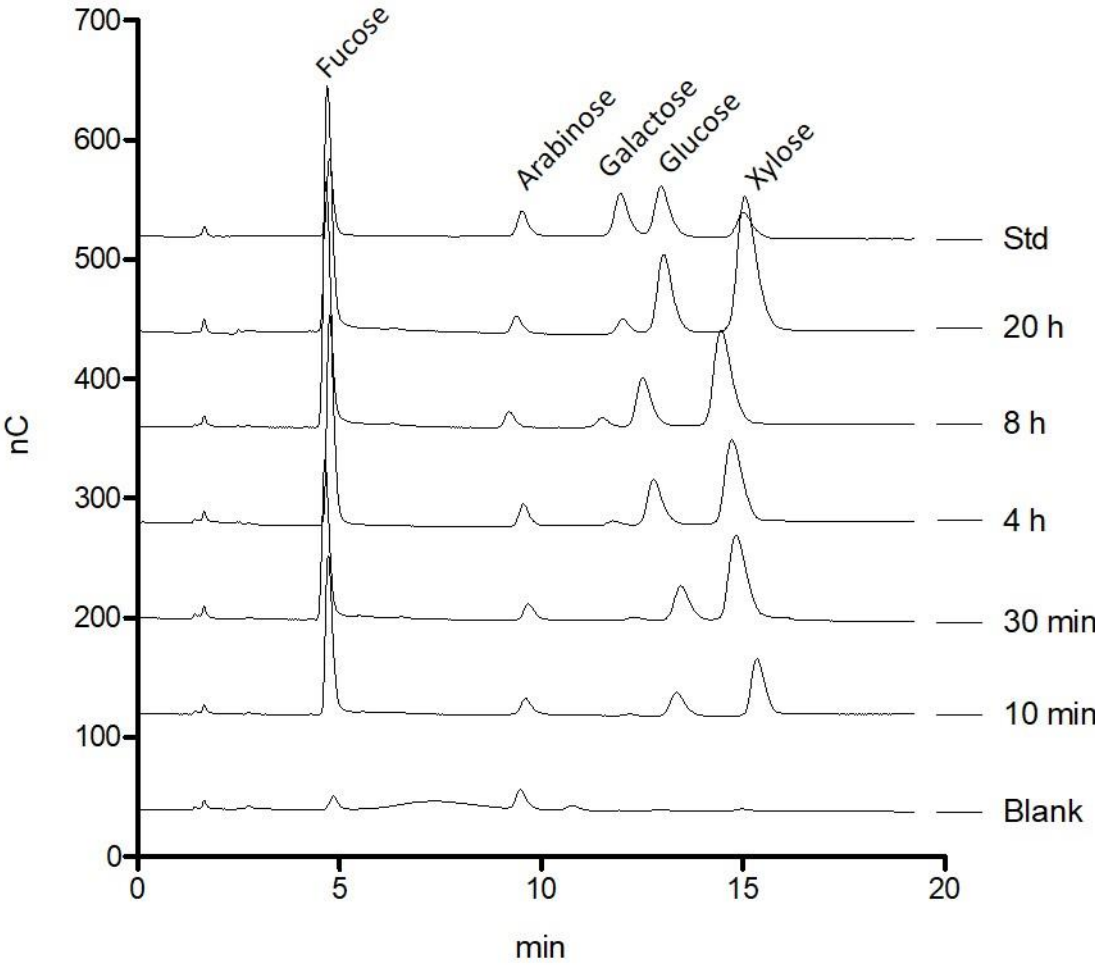

**Table S1:** Monosaccharides composition from the time course of the enzymatic treatment of XGO1 by using LacS 2.2 U and XylS 0.1 U

| <b>Time</b>    | <b>Galactose (<math>\mu\text{g}</math>)</b> | <b>Glucose (<math>\mu\text{g}</math>)</b> | <b>Xylose (<math>\mu\text{g}</math>)</b> |
|----------------|---------------------------------------------|-------------------------------------------|------------------------------------------|
| T <sub>0</sub> | ND                                          | ND                                        | ND                                       |
| 10 min         | ND                                          | 8.6 $\pm$ 1.2                             | 45.2 $\pm$ 4                             |
| 30 min         | ND                                          | 26.9 $\pm$ 0.5                            | 66.7 $\pm$ 1                             |
| 4 h            | ND                                          | 110.9 $\pm$ 2.4                           | 111.7 $\pm$ 0.7                          |
| 8 h            | 2.9 $\pm$ 0.3                               | 128.5 $\pm$ 7                             | 130.6 $\pm$ 3                            |
| 20 h           | 12.3 $\pm$ 1.1                              | 158.3 $\pm$ 1.3                           | 149.7 $\pm$ 1                            |

**Table S2:** monosaccharides composition from the time course of the enzymatic treatment of XGO1 by using LacS 18 U and XylS 0.1 U

| <b>Time</b>    | <b>Galactose (<math>\mu\text{g}</math>)</b> | <b>Glucose (<math>\mu\text{g}</math>)</b> | <b>Xylose (<math>\mu\text{g}</math>)</b> |
|----------------|---------------------------------------------|-------------------------------------------|------------------------------------------|
| T <sub>0</sub> | ND                                          | ND                                        | ND                                       |
| 10 min         | ND                                          | 17.1 $\pm$ 0.3                            | 52.7 $\pm$ 3.5                           |
| 30 min         | ND                                          | 89.5 $\pm$ 3                              | 128.5 $\pm$ 3                            |
| 4 h            | 10.9 $\pm$ 0.6                              | 242.5 $\pm$ 6.8                           | 232.1 $\pm$ 4                            |
| 8 h            | 22.3 $\pm$ 0.4                              | 257 $\pm$ 0.7                             | 235.6 $\pm$ 4                            |
| 20 h           | 41.3 $\pm$ 2.9                              | 348.9 $\pm$ 9.3                           | 299.9 $\pm$ 9.6                          |



**Table S3:** monosaccharides composition from the time course of enzymatic treatment of XGO2 by LacS 2.2 U, XylS 0.1 U and Ss $\alpha$ Fuc 0.2 U

| <b>Time</b>    | <b>Fucose (<math>\mu\text{g}</math>)</b> | <b>Galactose (<math>\mu\text{g}</math>)</b> | <b>Glucose (<math>\mu\text{g}</math>)</b> | <b>Xylose (<math>\mu\text{g}</math>)</b> |
|----------------|------------------------------------------|---------------------------------------------|-------------------------------------------|------------------------------------------|
| T <sub>0</sub> | 6.2 $\pm$ 0.4                            | ND                                          | 2.6 $\pm$ 0.1                             | 5.4 $\pm$ 0.6                            |
| 10 min         | 38.2 $\pm$ 1.8                           | ND                                          | 4.7 $\pm$ 0.4                             | 48.2 $\pm$ 6.8                           |
| 30 min         | 63.7 $\pm$ 2                             | 0.5 $\pm$ 0.1                               | 7.9 $\pm$ 1.5                             | 64 $\pm$ 4.6                             |
| 4 h            | 73.5 $\pm$ 1.3                           | 1.6 $\pm$ 0.2                               | 15.5 $\pm$ 0.7                            | 81.1 $\pm$ 4.2                           |
| 8 h            | 73 $\pm$ 1.8                             | 3.1 $\pm$ 0.1                               | 20.8 $\pm$ 0.1                            | 86.7 $\pm$ 3.7                           |
| 20 h           | 75.5 $\pm$ 5                             | 6.6 $\pm$ 1                                 | 34.7 $\pm$ 5.8                            | 115 $\pm$ 13                             |
